# Supplementary material
Source: Springer Nature journal article supplement (https://www.springermedizin.de/resource/supplementary/12889_2010_2226_MOESM2_ESM.pdf/9485046)

**Chlamydia MSM/Non-MSM Rate Ratios, 1999-2008, San Francisco**

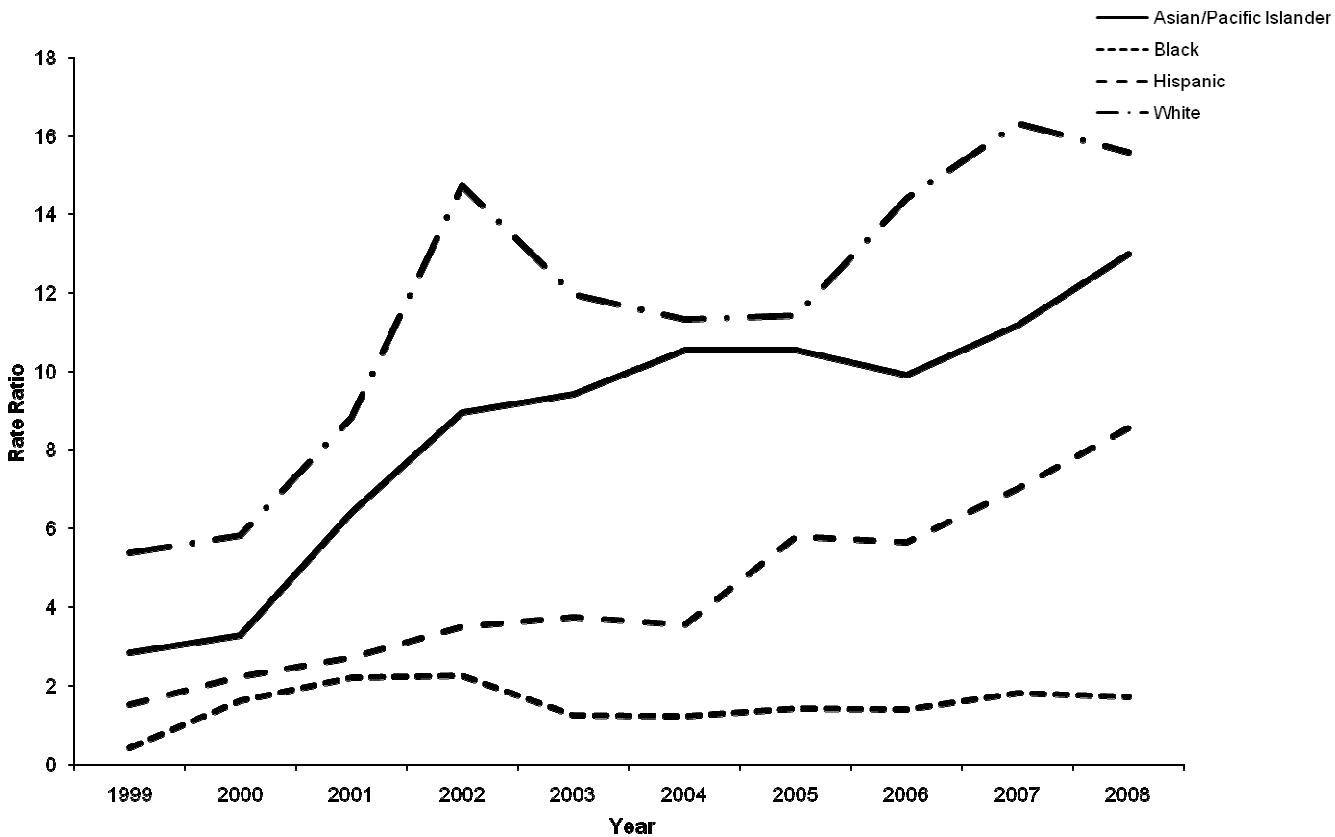

Supplement: MOESM2 [file 9485046]
